# Supplementary material for: Chemical abrasion: the mechanics of zircon dissolution
Source: Copernicus journal article supplement (doi:10.5194/gchron-5-127-2023), 2023-04-03
Supplement: Supplementary file 1 [file gchron-5-127-2023-supplement.zip]

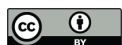

## *Supplement of*

# **Chemical abrasion: the mechanics of zircon dissolution**

**Alyssa J. McKanna et al.**

*Correspondence to:* Alyssa J. McKanna ([ajmckanna@lanl.gov](mailto:ajmckanna@lanl.gov))

- [gchron-5-127-2023-supplement-title-page.pdf](#)
- Supplement
  - .DS\_Store
  - Fig\_S1\_Zr04.mp4
  - Fig\_S2\_Zr04\_210C\_4h.mp4
  - Fig\_S3\_Zr30.mp4
  - Fig\_S4\_Zr30\_210C\_4h.mp4
  - Table\_S1.xlsx
  - Table\_S2.xlsx
  - Table\_S3.xlsx

The copyright of individual parts of the supplement might differ from the article licence.
